# Supplementary material for: Mobile Apps to Support the Self-Management of Hypertension: Systematic Review of Effectiveness, Usability, and User Satisfaction
Source: PubMed Central journal article supplement (PMC6079301; doi:10.2196/10723), 2018-07-23
Supplement: mhealth_v6i7e10723_app1.pdf [file mhealth_v6i7e10723_app1.pdf]

| Study and country                         | Study Design                                       | Study setting                                                               | Study duration | Subjects                                                                                                                                                                       | Interventions                                                                                                                                              | Study device (Operating system) | Study Quality |
|-------------------------------------------|----------------------------------------------------|-----------------------------------------------------------------------------|----------------|--------------------------------------------------------------------------------------------------------------------------------------------------------------------------------|------------------------------------------------------------------------------------------------------------------------------------------------------------|---------------------------------|---------------|
| <b>Anglada-Martínez et al Spain [39]</b>  | Single-arm prospective pre-post intervention study | Casanova Primary Care Clinic and Hospital Clinic                            | 6 months       | <b>Patients:</b><br>N= 42 (F 21.4%, M 78,6%)<br><b>Age:</b> (mean= 56)<br><b>SBP<sup>a</sup>:</b> NR <sup>b</sup> <b>DBP<sup>c</sup>:</b> NR<br><br><b>HCP: N= 5</b>           | <b>I<sup>d</sup></b> = Medplan platform (website for HCPs + smartphone app)<br><b>C<sup>e</sup></b> = usual care                                           | iPhone (iOS) or NR (Android)    | Poor          |
| <b>Mao et al USA [31]</b>                 | RCT <sup>f</sup> (Retrospective analysis)          | Data from a pilot Commercial collaboration                                  | 12 months      | <b>Patients:</b><br>N= 1012 (F 68%, M 32%)<br><b>I= 763, C= 73</b><br><b>Age</b> (mean= 44.63; I= 44.87 C= 42.36)<br><b>SBP:</b> I= 131.27 (1.52) C=NR<br><br><b>HCP: N=NA</b> | <b>I=</b> Vida app + a Bluetooth-connected pedometer and wireless scale + a Bluetooth-enabled blood pressure cuff<br><b>C=</b> usual care                  | iPhone (iOS) or NR (Android)    | Fair          |
| <b>Kang et al., South Korea [44]</b>      | Technology development study (survey)              | Cardiovascular clinics at tertiary hospitals                                | 4 weeks        | <b>Patients:</b><br>N=38 (F% 34, M 66%)<br><b>Age:</b> 56 years<br><br><b>HCP: N=CD</b>                                                                                        | <b>I=</b> Smartphone app + BP monitor<br><b>C=NA<sup>g</sup></b>                                                                                           | NR (NR)                         | Poor          |
| <b>Banerjee et al USA [32]</b>            | Technology development studies (Survey)            | A diabetes and hypertension clinic.                                         | NA             | <b>Patients:</b><br>N=385<br><b>Age:</b> NA<br><b>SBP:</b> NR <b>DBP:</b> NR<br><br><b>HCP: N=NA</b>                                                                           | <b>I=</b> Smartphone app (My vital signs)<br><b>C=NA</b>                                                                                                   | iPhone (iOS) or NR (Android)    | Poor          |
| <b>McGillicuddy et al (2013) USA [26]</b> | Survey                                             | Kidney Transplant Clinic at the Medical University of South Carolina (MUSC) | 3 months       | <b>Patients:</b><br>N= 99 (F 35%, M 65% (64/98))<br><b>Age:</b> (mean= 44.63)<br><b>SBP:</b> NR <b>DBP:</b> NR<br><br><b>HCP: N=NA</b>                                         | <b>I=</b> SMASH (cellular connected electronic medication device + a wireless (bluetooth-enabled) BP monitor + smartphone (app + messaging)<br><b>C=NA</b> | Motorola Droid X (Android)      | Fair          |
| <b>Sun et al China [43]</b>               | Longitudinal quasi-experiment design               | Tsinghua Elderly University & a nearby community                            | 6 weeks        | <b>Patients:</b><br>N=19 (F=57.8%, M= 42.1%)<br><b>Age:</b> 49-70 years (mean=59.2)<br><br><b>HCP: N=NA</b>                                                                    | <b>I=</b> Mobile app + BP monitor<br><b>C= NA</b>                                                                                                          | NR (NR)                         | Poor          |

| Study and country                        | Study Design                                  | Study setting                                                                                                                                    | Study duration | Subjects                                                                                                                                                                                                                                   | Interventions                                                                                                                              | Study device (Operating system) | Study Quality |
|------------------------------------------|-----------------------------------------------|--------------------------------------------------------------------------------------------------------------------------------------------------|----------------|--------------------------------------------------------------------------------------------------------------------------------------------------------------------------------------------------------------------------------------------|--------------------------------------------------------------------------------------------------------------------------------------------|---------------------------------|---------------|
| <b>Hallberg et al South Sweden [38]</b>  | Qualitative study (semi-structured interview) | 4 different primary health-care centers                                                                                                          | NR             | <b>Patients:</b><br>N= 49 (F=23, M=26)<br><b>Age:</b> 30-70 years (mean= 58)<br><br>HCP: N=NA                                                                                                                                              | Mobile app + Website + BP monitor                                                                                                          | NR (NR)                         | Good          |
| <b>Bengtsson et al South Sweden [36]</b> | Qualitative study (interview)                 | Primary health care center in a multi-cultural city suburb and one internal medical outpatient clinic at a provincial hospital in a smaller town | NR             | <b>Patients:</b><br>N=21 (F=42.86%, M=57.14%)<br><b>Age:</b> 49-82<br><br>HCP: N=4                                                                                                                                                         | Mobile app                                                                                                                                 | NR (NR)                         | Good          |
| <b>Logan et al Canada [33]</b>           | RCT                                           | The offices or clinics of physicians practicing in metropolitan Toronto.                                                                         | 12 months      | <b>Patients:</b><br>N= 110 (F 44.5%, M 55.4%), I= 55 C= 55<br><b>Age:</b> I=62.7 ±7.8<br>C=63.1±9.0<br>24-h <b>SBP:</b><br>I=139.4±11.6 , C= 139.4±10.6<br>24-h <b>DBP:</b> I= 73.9±10.6, C=75.4± 8.7<br><br>HCP: N=NA                     | I=smartphone (app)+ Bluetooth-enabled BP monitor + voice message.<br>C= usual care                                                         | BlackBerry (NR)                 | Good          |
| <b>Mendelson et al France [35]</b>       | RCT                                           | Sleep clinics                                                                                                                                    | 4 months       | <b>Patients:</b><br>N=107 (F 16.8%, M 83.2%) I=54, C=53<br><b>Age:</b> 63 ± 9<br>Office <b>SBP:</b> mmH = 135±13.2I= 135.3 ±14.1 C=138.4 ±6.4<br>office <b>DBP:</b> mmH=81.5 ±9.6 I= 80.9 ± 9.7, C= 82 ±9.6<br>Morning <b>SBP:</b> mmHg I= | I= Telemedicine (Smartphone app + automated BP monitor + CPAP fitted with a nasal mask and given an autotitrating machine.<br>C=usual care | NR(NR)                          | Fair          |

| Study and country                  | Study Design                 | Study setting                                                               | Study duration | Subjects                                                                                                                                                                                                                                                                                                                                                                                                   | Interventions                                                                                                                          | Study device (Operating system) | Study Quality |
|------------------------------------|------------------------------|-----------------------------------------------------------------------------|----------------|------------------------------------------------------------------------------------------------------------------------------------------------------------------------------------------------------------------------------------------------------------------------------------------------------------------------------------------------------------------------------------------------------------|----------------------------------------------------------------------------------------------------------------------------------------|---------------------------------|---------------|
|                                    |                              |                                                                             |                | <p>135.3±12.3 (SE)<br/> <b>C</b>=135.3 14.1 (SE)<br/> Evening <b>SBP</b>:<br/> mmHg=<b>I</b>=<br/> 130.8±13.2(SE) <b>C</b>=<br/> 132.0 17.1 (SE)<br/> Morning <b>DBP</b>: <b>I</b>=<br/> 80.9 mm Hg<br/> 9.7(SE) <b>C</b>=<br/> 82.0±9.0(SE)<br/> Evening <b>DBP</b>: <b>I</b>=<br/> 75.9 mm Hg<br/> 8.7(SE) <b>C</b>= 79.0<br/> mmHg 10.2 (SE)<br/> Type2 diabetes<br/> 36.4%</p> <p><b>HCP: N=NA</b></p> |                                                                                                                                        |                                 |               |
| <b>Bloss et al USA [28]</b>        | RCT                          | Scripps Translational Science Institute                                     | 6 months       | <p><b>Patients:</b><br/> <b>N</b>= 160 (F 70%, M 30%)<br/> <b>Age:</b> 33-81 years (Mean=56(9.0) (SD)<br/> Hypertension 67(89)<br/> non-insulin dependent diabetes (NIDDM) (9)<br/> arrhythmia (10)<br/> insulin-dependent diabetes (IDDM) (5),<br/> Comorbidity (21)</p> <p><b>HCP: N=NA</b></p>                                                                                                          | <b>I</b> = BP monitor +iPhone with corresponding apps+ HealthyCircles account (online and mobile)+<br><b>C</b> = usual care+ education | iPhone 4 or iPhone 4s (iOS)     | Poor          |
| <b>McGillicuddy et al USA [25]</b> | RCT (Retrospective analysis) | Kidney Transplant Clinic at the Medical University of South Carolina (MUSC) | 12 months      | <p><b>Patients:</b><br/> <b>N</b>= 18 (F 44.4%, M 55.6%)<br/> <b>Age:</b> 33-81 years<br/> Mean=<b>I</b>=<br/> 42.44(12.04)<br/> <b>C</b>=57.89 (8.72) (SD)</p> <p><b>HCP: N=NA</b></p>                                                                                                                                                                                                                    | <b>I</b> =cellular connected electronic medication device + BP monitor+ smartphone app+ email + SMS or call                            | Motorola Droid X (Android)      | Poor          |

| Study and country                  | Study Design                   | Study setting                                                                                 | Study duration | Subjects                                                                                                                                                                                                                                                    | Interventions                                                                                                                                                                                                | Study device (Operating system)                                                                             | Study Quality |
|------------------------------------|--------------------------------|-----------------------------------------------------------------------------------------------|----------------|-------------------------------------------------------------------------------------------------------------------------------------------------------------------------------------------------------------------------------------------------------------|--------------------------------------------------------------------------------------------------------------------------------------------------------------------------------------------------------------|-------------------------------------------------------------------------------------------------------------|---------------|
| <b>Carrera et al Spain [40]</b>    | Technology development studies | NA                                                                                            | NA             | N= 20                                                                                                                                                                                                                                                       | <b>I</b> =BP monitor + smartphone and tablet (app + messaging)<br><b>C</b> =NA                                                                                                                               | Samsung Galaxy S2, Samsung Galaxy S3 and Nexus 5 (Android v. 5.1.1), Ipad 2 (iOS) and Iphone 6 (iOS v. 8.4) | Poor          |
| <b>McGillicuddy et al USA [27]</b> | A proof-of-concept RCT         | Kidney Transplant Clinic at the Medical University of South Carolina (MUSC)                   | 3 months       | <b>Patients:</b><br>N= 19 (F 68%, M 32%)<br><b>I</b> = 9, <b>C</b> = 10<br><b>Age:</b> (Mean= <b>I</b> = 42.44 <b>C</b> = 57.6 )<br><b>SBP:</b> <b>I</b> = 138.35, <b>C</b> =135.11<br><b>DBP:</b> <b>I</b> =87.55, <b>C</b> =76.11<br><br><b>HCP:</b> N=NA | <b>I</b> = cellular connected electronic medication device + BP monitor+ smartphone app + email + SMS or call<br><b>C</b> =usual care                                                                        | Motorola Droid X (Android)                                                                                  | Poor          |
| <b>Moore et al USA [30]</b>        | RCT                            | The Ambulatory Practice of the Future (APF) at the Massachusetts General Hospital is designed | 12 weeks       | <b>Patients:</b><br>N= 42 (F 40.5%, M 59.5%)<br><b>I</b> = 20 <b>C</b> = 22<br><b>Age:</b> NA (Mean=50.0 ±12.8)<br><b>SBP:</b> 147.6; <b>I</b> = 145.7, <b>C</b> =149.8<br><b>DBP:</b> 87.2; <b>I</b> =86.0, <b>C</b> =88.43<br><br><b>HCP:</b> N=NA        | <b>I</b> = Tablet app (CollaboRhythm )<br>a wireless BP monitor<br><b>C</b> = usual care                                                                                                                     | NR (NR)                                                                                                     | Poor          |
| <b>Petrella et al Canada [34]</b>  | Parallel-group, RCT            | Gateway Rural Health Research Institute, Seaforth (community-based research centre)           | 52 weeks       | <b>Patients:</b><br>N=149 (F 74.5%; M 25.5%)<br><b>I</b> = 75, <b>C</b> = 74<br><b>Age:</b><br>Mean <b>I</b> = 55.7, <b>C</b> = 57.8<br><br><b>HCP:</b> N=NA                                                                                                | <b>I</b> = Smartphone app(healthyanywhere) + Bluetooth™ enabled BP monitor and a glucometer+ a pedometer +Aerobic exercise prescription<br><b>C</b> = exercise prescription and logged exercise in a journal | Blackberry Curve 8300 or 8530 (NR)                                                                          | Poor          |

| Study and country       | Study Design     | Study setting                                                                          | Study duration | Subjects                                                                                                                                                                                                                                                                                                                                  | Interventions                                                                                                                        | Study device (Operating system) | Study Quality |
|-------------------------|------------------|----------------------------------------------------------------------------------------|----------------|-------------------------------------------------------------------------------------------------------------------------------------------------------------------------------------------------------------------------------------------------------------------------------------------------------------------------------------------|--------------------------------------------------------------------------------------------------------------------------------------|---------------------------------|---------------|
| Davidson et al USA [24] | RCT              | NR                                                                                     | 6 months       | <b>Patients:</b><br>N= 38 (F 68%, M 32%)<br><b>I= 33, C= 30</b><br><b>Age:</b> NA<br>Mean<br><b>I=</b> 47.50±11.08,<br><b>C=</b> 48.45±11.32<br><b>SBP: I=, C= NA</b><br><b>DBP: I=, C= NA</b><br><br><b>HCP: N=NA</b>                                                                                                                    | <b>I=</b> cellular connected electronic medication device + BP monitor+ smartphone app + email + SMS or call<br><b>C=</b> usual care | Motorola Droid X (Android)      | Poor          |
| Or & Tao [42]           | RCT              | Patients homes                                                                         | 3 months       | <b>Patients:</b><br>N= 63 (F5%, M95%)<br><b>I= 33, C= 30</b><br><b>Age:</b> 30-70 years (Mean=69.5)<br><b>SBP/DBP:</b><br><b>I=</b> 134.9/79.5,<br><b>C=</b> 130.1/76.1<br><br><b>HCP: N=NA</b>                                                                                                                                           | <b>I=</b> tablet + a 2-in-1 BG and BP monitor<br><b>C=</b> a 2-in-1 BG and BP monitor + a log book                                   | NR (NR)                         | Fair          |
| Albini et al Italy [41] | Pilot study      | General Practitioners clinics                                                          | 9 months       | <b>Patients:</b><br>N = 601 (F :38.5% M: 61.5%)<br><b>I = 303, C = 298</b><br>Age <b>I=</b> 57.9±11.3<br><b>C=</b> 56.9±11.5<br><b>SBP: I=</b> 148.3 ±11.7,<br><b>C=</b> 145.4±3.9<br><b>DBP:</b><br><b>I =</b> 91.6 ± 6.5, <b>C =</b> 88.8 ± 6.1<br><b>DBP:</b><br><b>IG =</b> 91.6 ± 6.5, <b>CG =</b> 88.8 ± 6.1<br><br><b>HCP: N=9</b> | <b>I=</b> Eruhypertension APP(E-APP)+ Misuriamo platform + BP monitoring<br><br><b>C=</b> usual care                                 | NR(NR)                          | Poor          |
| Patel et al USA [29]    | Open label trial | Internal medicine, renal/hypertension, and cardiology clinics of the George Washington | 10 months      | <b>Patients:</b><br>N= 50 (M: 31%, F:69%)<br><b>Age:</b> 53 years (33-78)<br><b>SBP: 144, DBP: 89</b><br><br><b>HCP: N=NA</b>                                                                                                                                                                                                             | <b>I=</b> Smartphone app<br><b>C=NA</b>                                                                                              | NR (NR)                         | Fair          |

| Study and country                  | Study Design                     | Study setting                           | Study duration | Subjects                                                                                                                                   | Interventions                                                                                                          | Study device (Operating system) | Study Quality |
|------------------------------------|----------------------------------|-----------------------------------------|----------------|--------------------------------------------------------------------------------------------------------------------------------------------|------------------------------------------------------------------------------------------------------------------------|---------------------------------|---------------|
|                                    |                                  | University Medical Faculty              |                |                                                                                                                                            |                                                                                                                        |                                 |               |
| <b>Bengtsson et al Sweden [37]</b> | Explorative , longitudinal study | 4 different primary health-care centers | 8 weeks        | <b>Patients:</b><br>N= 50 (F 48%, M 52%)<br><b>Age:</b> 33-81 years (Mean=59.5)<br><b>SBP:</b> 142, <b>DBP:</b> 84<br><br><b>HCP:</b> N=NA | <b>I=</b> mobile phone-based system for the self-report questions<br>+ BP monitor<br>+ web-based system<br><b>C=NA</b> | NR (NR)                         | Good          |

<sup>a</sup>SBP: systaltic blood pressure; <sup>b</sup>NR: not reported; <sup>c</sup>DBP: diastolic blood pressure; <sup>d</sup>I intervention group/phase <sup>e</sup>C: control group/phase; <sup>f</sup>RCT: randomised control trial; <sup>g</sup>NA: not applicable; <sup>h</sup> HCP: health care professionals.
