# Supplementary material for: Mobile Apps to Support the Self-Management of Hypertension: Systematic Review of Effectiveness, Usability, and User Satisfaction
Source: PubMed Central journal article supplement (PMC6079301; doi:10.2196/10723), 2018-07-23
Supplement: mhealth_v6i7e10723_app2.pdf [file mhealth_v6i7e10723_app2.pdf]

1. exp Hypertension/
  2. hyperten\*.kw,ti.
  3. high blood pressure.ab,ti.
  4. HTN.ab,ti.
  5. 1 or 2 or 3 or 4
  6. exp Mobile Applications/
  7. mobile health.ab,ti.
  8. \*Medical Informatics Applications/
  9. (ehealth or e-health or e?health).ab,ti.
  10. (mhealth or m-health or m?health).ab,ti.
  11. (window? adj3 phone?).ab,ti.
  12. (window? adj3 mobile?).ab,ti.
  13. apps.ab,ti.
  14. (iphone? or i-phone?).ab,ti.
  15. (ipad? or i-pad?).ab,ti.
  16. (ipod?touch or i-pod? or ipod?).ab,ti.
  17. nokia.ab,ti.
  18. palm OS.ab,ti.
  19. blackberry\*.ab,ti.
  20. symbian.ab,ti.
  21. personal digital assistant?.ab,ti.
  22. PDA.ab,ti.
  23. (smartphone? or smart?phone?).ab,ti.
  24. exp cellular phone/
  25. cell phone?.ab,ti.
  26. mobile phone?.ab,ti.
  27. applet?.ab,ti.
  28. (software adj3 app\*).ab,ti.
  29. (mobile adj3 software).ab,ti.
  30. (mobile adj3 app\*).ab,ti.
  31. (smartphone? or smart?phone?).ab,ti.
  32. (telemonitor\* or tele?monitor\*).ab,ti.
  33. (telemedicine or tele?medicine).ab,ti.
  34. (telehealth or tele?health).ab,ti.
  35. exp Computers, Handheld/
  36. or/6-35
  37. (remote adj2 (monitor\* or treat\* or care)).ab,ti.
  38. exp self care/
  39. self care.ab,ti.
  40. self monitor\*.ab,ti.
  41. self manage\*.ab,ti.
  42. self treat\*.ab,ti.
  43. self medication.ab,ti.
  44. self administration.ab,ti.
-
