# Supplementary material for: Mobile Apps to Support the Self-Management of Hypertension: Systematic Review of Effectiveness, Usability, and User Satisfaction
Source: PubMed Central journal article supplement (PMC6079301; doi:10.2196/10723), 2018-07-23
Supplement: mhealth_v6i7e10723_app4.pdf [file mhealth_v6i7e10723_app4.pdf]

| Study                          | Selection bias                                            |                                                       | Performance bias                       | Detection bias                                                          | Attrition bias                                      | Reporting bias                                                   | Other bias                                                                                                                                                                                 |
|--------------------------------|-----------------------------------------------------------|-------------------------------------------------------|----------------------------------------|-------------------------------------------------------------------------|-----------------------------------------------------|------------------------------------------------------------------|--------------------------------------------------------------------------------------------------------------------------------------------------------------------------------------------|
|                                | Random sequence generation                                | Allocation concealment                                | Blinding of participants and personnel | Blinding of outcome assessors to intervention allocation                | incomplete outcome data                             | Selective reporting of the outcome, subgroups, or analysis       | Others                                                                                                                                                                                     |
| McGillicuddy et al (2013) [27] | ?                                                         | ?                                                     | ?                                      | ✓                                                                       | ✓                                                   | ✓                                                                | x                                                                                                                                                                                          |
|                                | Random sequence generation was not noted within the study | Allocation concealment was not noted within the study | The blinding was not described.        | The nurses or coordinators blinded to the subject's cohort assignment   | Titration rate was good 88.7%.                      | All reported outcomes in methodology reported in result section. | The study was funded and ethically approved and has similar baseline characteristic. However small sample size may affect detecting the impacts of technology and generalize the findings. |
| McGillicuddy et al (2015) [25] | ?                                                         | ?                                                     | ?                                      | ✓                                                                       | ✓                                                   | ✓                                                                | x                                                                                                                                                                                          |
|                                | Random sequence generation was not noted within the study | Allocation concealment was not noted within the study | The blinding was not described.        | The nurses or coordinators blinded to the subject's cohort assignment t | Titration rate was good 88.7%.                      | All reported outcomes in methodology reported in result section. | The study was funded and ethically approved and has similar baseline characteristic. However small sample size may affect detecting the impacts of technology and generalize the findings. |
| Davidson et al [24]            | ?                                                         | x                                                     | ?                                      | ?                                                                       | ✓                                                   | ✓                                                                | x                                                                                                                                                                                          |
|                                | Random sequence generation was not noted within the study | Allocation concealment was not noted within the study | The blinding was not described.        | The blinding was not described.                                         | only one person drop out for the intervention group | All pre-specified outcomes are done                              | The study was funded and ethically approved and has some similar baseline characteristic; it is not similar at DBP, age. However, very small sample size; affects detecting the impacts of |

|                  |                                                                                                                           |                                                                                                                           |                                                                                                          |                                                                                                         |                                                                                                                                                                                           |                                                                           |                                                                                                                                                |
|------------------|---------------------------------------------------------------------------------------------------------------------------|---------------------------------------------------------------------------------------------------------------------------|----------------------------------------------------------------------------------------------------------|---------------------------------------------------------------------------------------------------------|-------------------------------------------------------------------------------------------------------------------------------------------------------------------------------------------|---------------------------------------------------------------------------|------------------------------------------------------------------------------------------------------------------------------------------------|
|                  |                                                                                                                           |                                                                                                                           |                                                                                                          |                                                                                                         |                                                                                                                                                                                           |                                                                           | technology and generalize the findings.                                                                                                        |
| Bloss et al [28] | x                                                                                                                         | x                                                                                                                         | ?                                                                                                        | x                                                                                                       | x                                                                                                                                                                                         | √                                                                         | √                                                                                                                                              |
|                  | Random sequence generation was not noted within the study                                                                 | Treatment allocation with unblinded research coordinator.                                                                 | The blinding was not described.                                                                          | Unblinded research coordinator.                                                                         | Number of missing in control is more than intervention (23% intervention vs. 13% in control); reasons for loss to follow-up were not described, and did not intend to treat analysis used | All outcomes in the methods section were reported in the results section. | The study was funded and ethically approved, good sample size; and similar baseline characteristic.                                            |
| Or & Tao [42]    | √                                                                                                                         | √                                                                                                                         | x                                                                                                        | x                                                                                                       | √                                                                                                                                                                                         | √                                                                         | x                                                                                                                                              |
|                  | Using permuted blocks of size 4 and 6 (with sequentially numbered, opaque, sealed envelopes)                              | Using permuted blocks of size 4 and 6 (with sequentially numbered, opaque, sealed envelopes) presented in random order    | Given the nature of the study and its intervention, the patients and outcome assessors were not blinded. | Given the nature of the study and its intervention, the patients and outcome assessors were not blinded | only one person drop out for each group                                                                                                                                                   | All reported outcomes in methodology reported in result section,          | The study was funded and ethically approved, but small sample size may affect detecting the impacts of technology and generalize the findings. |
| Logan et al [33] | √                                                                                                                         | √                                                                                                                         | ?                                                                                                        | ?                                                                                                       | √                                                                                                                                                                                         | √                                                                         | √                                                                                                                                              |
|                  | Randomized; blocks of 4 and 6 patients randomly arranged and administered by a person not directly involved in the study. | Randomized; blocks of 4 and 6 patients randomly arranged and administered by a person not directly involved in the study. | a prospective, randomized, open, blinded primary endpoint trial; which means no patients were blinded.   | a prospective, randomized, open, blinded primary endpoint trial; which means no physician were blinded. | Only one person drop out for the intervention group                                                                                                                                       | all pre-specified outcomes are done                                       | The study was funded and ethically approved, good sample size; and similar baseline characteristic.                                            |
| Petrella et al   | √                                                                                                                         | x                                                                                                                         | ?                                                                                                        | x                                                                                                       | ?                                                                                                                                                                                         | √                                                                         | √                                                                                                                                              |

|                      |                                                                                                                                       |                                                                                              |                                                                                               |                                                                                               |                                                                                                                                 |                                                                                                     |                                                                                                                                            |
|----------------------|---------------------------------------------------------------------------------------------------------------------------------------|----------------------------------------------------------------------------------------------|-----------------------------------------------------------------------------------------------|-----------------------------------------------------------------------------------------------|---------------------------------------------------------------------------------------------------------------------------------|-----------------------------------------------------------------------------------------------------|--------------------------------------------------------------------------------------------------------------------------------------------|
| [34]                 | Block randomization (based on appointment time).                                                                                      | Due to the randomization procedure, research staff could not be blinded to group allocation. | Due to this randomization procedure, research staff could not be blinded to group allocation. | Due to this randomization procedure, research staff could not be blinded to group allocation. | more drop out in the control (14 vs. 8 in the intervention). Did not use intention to treat analysis.                           | all outcomes in the methods section were reported in the results section.                           | The study was funded and ethically approved, good sample size; and similar baseline characteristic.                                        |
| Moor et al [30]      | √                                                                                                                                     | ?                                                                                            | ?                                                                                             | ?                                                                                             | √                                                                                                                               | √                                                                                                   | x                                                                                                                                          |
|                      | Each subject was assigned the next sequential study number, which was pre-randomized to either the intervention or the control group. | Allocation concealment was not noted within the study                                        | The blinding was not described.                                                               | The blinding was not described.                                                               | only one person drop out for each group                                                                                         | Based on paper only, protocol not obtained. All pre-specified outcomes were reported in the results | The study was funded and ethically approved, small sample size may affects detecting the impacts of technology and generalize the findings |
| Mendelson et al [35] | √                                                                                                                                     | √                                                                                            | ?                                                                                             | ?                                                                                             | x                                                                                                                               | √                                                                                                   | √                                                                                                                                          |
|                      | Randomization was stratified by the recruiting center in blocks of 6 participants.                                                    | Treatment allocation prepared by an individual otherwise unaffiliated with the study         | The blinding was not described.                                                               | The blinding was not described.                                                               | Almost the same number missing in both groups, however, more people withdrew from the intervention (8 vs 1 from the usual care. | all outcomes in the methods section were reported in the results section.                           | The study was funded and ethically approved, good sample size; and similar baseline characteristic                                         |

<sup>a</sup>√: low risk of bias, <sup>b</sup>x: High risk of bias, <sup>c</sup>?: unclear risk of bias
