# Supplementary material for: Mobile Apps to Support the Self-Management of Hypertension: Systematic Review of Effectiveness, Usability, and User Satisfaction
Source: PubMed Central journal article supplement (PMC6079301; doi:10.2196/10723), 2018-07-23
Supplement: mhealth_v6i7e10723_app5.pdf [file mhealth_v6i7e10723_app5.pdf]

| Criteria/ Study                                                                                                                                                      | Albini et al<br>[41] |
|----------------------------------------------------------------------------------------------------------------------------------------------------------------------|----------------------|
| 1- Was the study described as randomized, a randomized trial, a randomized clinical trial, or an RCT?                                                                | x <sup>b</sup>       |
| 2. Was the method of randomization adequate (i.e., use of randomly generated assignment)?                                                                            | x                    |
| 3. Was the treatment allocation concealed (so that assignments could not be predicted)?                                                                              | x                    |
| 4. Were study participants and providers blinded to treatment group assignment?                                                                                      | x                    |
| 5. Were the people assessing the outcomes blinded to the participants' group assignments?                                                                            | x                    |
| 6. Were the groups similar at baseline on important characteristics that could affect outcomes (e.g., demographics, risk factors, co-morbid conditions)?             | CD <sup>e</sup>      |
| 7. Was the overall drop-out rate from the study at endpoint 20% or lower of the number allocated to treatment?                                                       | √ <sup>a</sup>       |
| 8. Was the differential drop-out rate (between treatment groups) at endpoint 15 percentage points or lower?                                                          | NR                   |
| 9. Was there high adherence to the intervention protocols for each treatment group?                                                                                  | NA <sup>d</sup>      |
| 10. Were other interventions avoided or similar in the groups (e.g., similar background treatments)?                                                                 | NA                   |
| 11. Were outcomes assessed using valid and reliable measures, implemented consistently across all study participants?                                                | √                    |
| 12. Did the authors report that the sample size was sufficiently large to be able to detect a difference in the main outcome between groups with at least 80% power? | NR <sup>c</sup>      |
| 13. Were outcomes reported or subgroups analyzed prespecified (i.e., identified before analyses were conducted)?                                                     | √                    |

|                                                                                                                                                       |                                                                                                         |
|-------------------------------------------------------------------------------------------------------------------------------------------------------|---------------------------------------------------------------------------------------------------------|
| 14. Were all randomized participants analyzed in the group to which they were originally assigned, i.e., did they use an intention-to-treat analysis? | x                                                                                                       |
| <b>Quality rating &amp; additional comment</b>                                                                                                        | Poor quality due to lack of randomization and blinding procedures (selection bias) that affect validity |

<sup>a</sup>√: Yes; <sup>b</sup>x: No; <sup>c</sup>NR, not reported; <sup>d</sup>NA, not applicable; <sup>e</sup>CD, cannot determine
