# Supplementary material for: Mobile Apps to Support the Self-Management of Hypertension: Systematic Review of Effectiveness, Usability, and User Satisfaction
Source: PubMed Central journal article supplement (PMC6079301; doi:10.2196/10723), 2018-07-23
Supplement: mhealth_v6i7e10723_app8.pdf [file mhealth_v6i7e10723_app8.pdf]

| Criteria/ Study                                                                         | Hallberg et al [38] | Bengtsson et al [36] |
|-----------------------------------------------------------------------------------------|---------------------|----------------------|
| 1-Was there a clear statement of the aims of the research?                              | √ <sup>a</sup>      | √                    |
| 2. Is a qualitative methodology appropriate?                                            | √                   | √                    |
| 3-Was the research design appropriate to address the aims of the research?              | √                   | √                    |
| 4- Was the recruitment strategy appropriate to the aims of the research?                | √                   | √                    |
| 5. Was the data collected in a way that addressed the research issue?                   | x <sup>b</sup>      | x                    |
| 6. Has the relationship between researcher and participants been adequately considered? | x                   | x                    |
| 7. Have ethical issues been taken into consideration?                                   | √                   | √                    |
| 8. Was the data analysis sufficiently rigorous?                                         | √                   | √                    |
| 9. Is there a clear statement of findings?                                              | √                   | √                    |
| 10. How valuable is the research?                                                       | x                   | √                    |

<sup>a</sup>√: Yes; <sup>b</sup>x:No; <sup>c</sup>CT, Cannot tell
