# Supplementary material for: Mobile Apps to Support the Self-Management of Hypertension: Systematic Review of Effectiveness, Usability, and User Satisfaction
Source: JMIR Mhealth Uhealth. 2018 Jul 23;6(7):e10723. doi: 10.2196/10723 (PMC6079301; doi:10.2196/10723)
Supplement: Multimedia Appendix 7 [file mhealth_v6i7e10723_app7.pdf]

| <b>Criteria/ Study</b>                                                                                                                                                                     | <b>Anglada-Martínez et al [39]</b> | <b>Patel et al [29]</b> |
|--------------------------------------------------------------------------------------------------------------------------------------------------------------------------------------------|------------------------------------|-------------------------|
| 1. Was the study question or objective clearly stated?                                                                                                                                     | √ <sup>a</sup>                     | √                       |
| 2. Were eligibility/selection criteria for the study population prespecified and clearly described?                                                                                        | √                                  | √                       |
| 3. Were the participants in the study representative of those who would be eligible for the test/service/intervention in the general or clinical population of interest?                   | <b>CD</b>                          | √                       |
| 4. Were all eligible participants that met the prespecified entry criteria enrolled?                                                                                                       | <b>x<sup>b</sup></b>               | √                       |
| 5. Was the sample size sufficiently large to provide confidence in the findings?                                                                                                           | <b>x</b>                           | √                       |
| 6. Was the test/service/intervention clearly described and delivered consistently across the study population?                                                                             | √                                  | √                       |
| 7. Were the outcome measures prespecified, clearly defined, valid, reliable, and assessed consistently across all study participants?                                                      | <b>CD<sup>e</sup></b>              | <b>CD</b>               |
| 8. Were the people assessing the outcomes blinded to the participants' exposures/interventions?                                                                                            | <b>NR<sup>c</sup></b>              | <b>CD</b>               |
| 9. Was the loss to follow-up after baseline 20% or less? Were those lost to follow-up accounted for in the analysis?                                                                       | <b>x</b>                           | √                       |
| 10. Did the statistical methods examine changes in outcome measures from before to after the intervention? Were statistical tests done that provided p values for the pre-to-post changes? | √                                  | √                       |
| 11. Were outcome measures of interest taken multiple times before the intervention and multiple times after the intervention (i.e., did they                                               | <b>x</b>                           | <b>x</b>                |

|                                                                                                                                                                                                                             |                                                                                                                                                                          |                                                                                                                                                                           |
|-----------------------------------------------------------------------------------------------------------------------------------------------------------------------------------------------------------------------------|--------------------------------------------------------------------------------------------------------------------------------------------------------------------------|---------------------------------------------------------------------------------------------------------------------------------------------------------------------------|
| use an interrupted time-series design)?                                                                                                                                                                                     |                                                                                                                                                                          |                                                                                                                                                                           |
| 12. If the intervention was conducted at a group level (e.g., a whole hospital, a community, etc.) did the statistical analysis take into account the use of individual-level data to determine effects at the group level? | <sup>d</sup> NA                                                                                                                                                          | NA                                                                                                                                                                        |
| <b>Quality rating &amp; additional comment</b>                                                                                                                                                                              | <b>Poor quality</b> because of small number of participants and potential of selection and titration bias as well as some missing information that affect study validity | <b>Fair quality;</b> Despite of relatively small sample size and single group, it has good attrition rate and use interrupted time series design as well as well reported |

<sup>a</sup>√: Yes; <sup>b</sup>x: No; <sup>c</sup>NR, not reported; <sup>d</sup>NA, not applicable; <sup>e</sup>CD, cannot determine
